# 1    **Copper(II) Gluconate Boosts the Anti-SARS-CoV-2 Effect of Disulfiram *in vitro***

2    Luyan Xu,<sup>[a],[§]</sup> Wei Xu,<sup>[b],[§]</sup> Simeng Zhao,<sup>[c]</sup> Suwen Zhao,<sup>[c]</sup> Lu Lu,<sup>\*[b]</sup> and Bo-Lin Lin<sup>\*[a]</sup>

3    [a] School of Physical Science and Technology, ShanghaiTech University, 393 Middle Huaxia Road,  
4    Pudong new district, Shanghai, 201210, P. R. China. E-mail: [linbl@shanghaitech.edu.cn](mailto:linbl@shanghaitech.edu.cn)

5    [b] Key Laboratory of Medical Molecular Virology (MOE/NHC/CAMS), Shanghai Institute of  
6    Infectious Disease and Biosecurity, School of Basic Medical Sciences, Fudan University, Shanghai  
7    200032, P. R. China. E-mail: [lul@fudan.edu.cn](mailto:lul@fudan.edu.cn)

8    [c] iHuman Institute and School of Life Science and Technology, ShanghaiTech University, 393 Middle  
9    Huaxia Road, Pudong new district, Shanghai, 201210, P. R. China.

10    [§] Co-first authors

11

12

13 **Abstract:** Disulfiram is a 70-year-old anti-alcoholism drug, while copper(II) gluconate ( $\text{Cu}(\text{Glu})_2$ ) is a  
14 commonly used food additive or copper supplement. Here we disclose that the combination of disulfiram  
15 and copper(II) gluconate drastically enhances the anti-SARS-CoV-2 activity at the cellular level as  
16 compared to disulfiram or copper(II) gluconate alone. A 1:1 mixture of disulfiram and copper(II)  
17 gluconate shows an  $\text{EC}_{50}$  value of 154 nM against SARS-CoV-2 at the cellular level, much lower than the  
18 17.45  $\mu\text{M}$  reported for disulfiram alone. A preliminary mechanism is proposed to rationalize the observed  
19 promotional effect.

We observed that the inhibitory effect of disulfiram (DSF) or copper(II) gluconate alone on SARS-COV-2 at the cellular level was 67.59% and 66.98% at 10  $\mu$ M, respectively, while the inhibitory effect of a fresh 1:1 mixture of disulfiram and copper(II) gluconate was over 99% at 10  $\mu$ M (**Table 1**). Further measurements showed that the EC<sub>50</sub> of the 1:1 combination of disulfiram and copper(II) gluconate against SARS-COV-2 at the cellular level was 154 nM (**Figure 1**), significantly lower than that of disulfiram alone (17.45  $\mu$ M).<sup>1</sup>

**Table 1.** Inhibitory ratio of various chemicals by single-point inhibition assay at 10  $\mu$ M onto SARS-COV-2 at the cellular level, determined by qRT-PCR analysis. n = 3 biological replicates.

| Concentration<br>(10 $\mu$ M) | Cu(Glu) <sub>2</sub> |       |       | DSF   |       |       | DSF+Cu(Glu) <sub>2</sub> |       |       |
|-------------------------------|----------------------|-------|-------|-------|-------|-------|--------------------------|-------|-------|
| Inhibition (%)                | 75.86                | 61.94 | 63.14 | 65.47 | 63.79 | 73.52 | 99.87                    | 99.85 | 99.87 |

As shown in Figure 1, the mixture of disulfiram and copper(II) gluconate had much improved inhibitory activity of against SARS-CoV-2 infection with an EC<sub>50</sub> of 154 nM (**Figure 1**). The results showed that viral RNA levels of the mixture of disulfiram and copper(II) gluconate were significantly lower than that of the non-mixture groups (disulfiram or copper(II) gluconate).

UV-vis spectroscopy revealed that the appearance and growth of an absorption peak at 433 nm from the 1:1 mixture of disulfiram and copper(II) gluconate over time, indicating the gradual formation of diethyldithiocarbamic acid cupric salt, Cu(DDC)<sub>2</sub> (**Figure 2**). Dynamical light scattering spectroscopy showed that the resultant Cu(DDC)<sub>2</sub> formed nanoparticles with the sizes of several hundred nanometers at the early stage (**Figure 3**). The particles slowly became larger than 1 micron and eventually precipitated out of the solution.

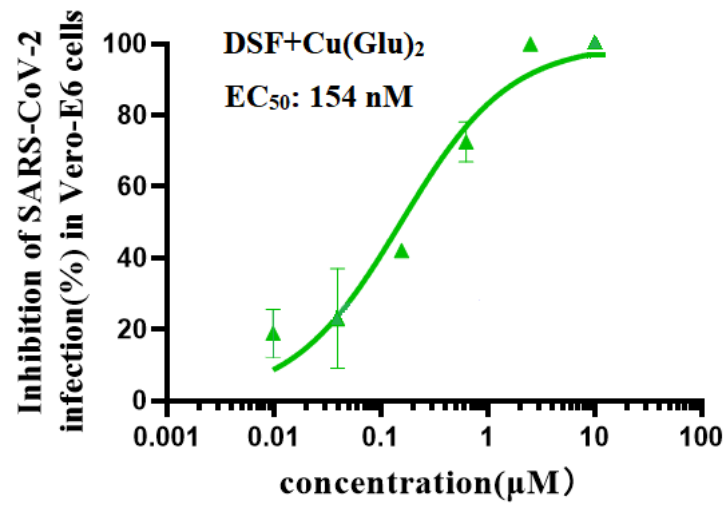

39

40 **Figure 1.** Dose-response curve for DSF+Cu(Glu)<sub>2</sub>, determined by qRT-PCR analysis, All data are shown  
 41 as mean ± s.e.m., n = 3 biological replicates.

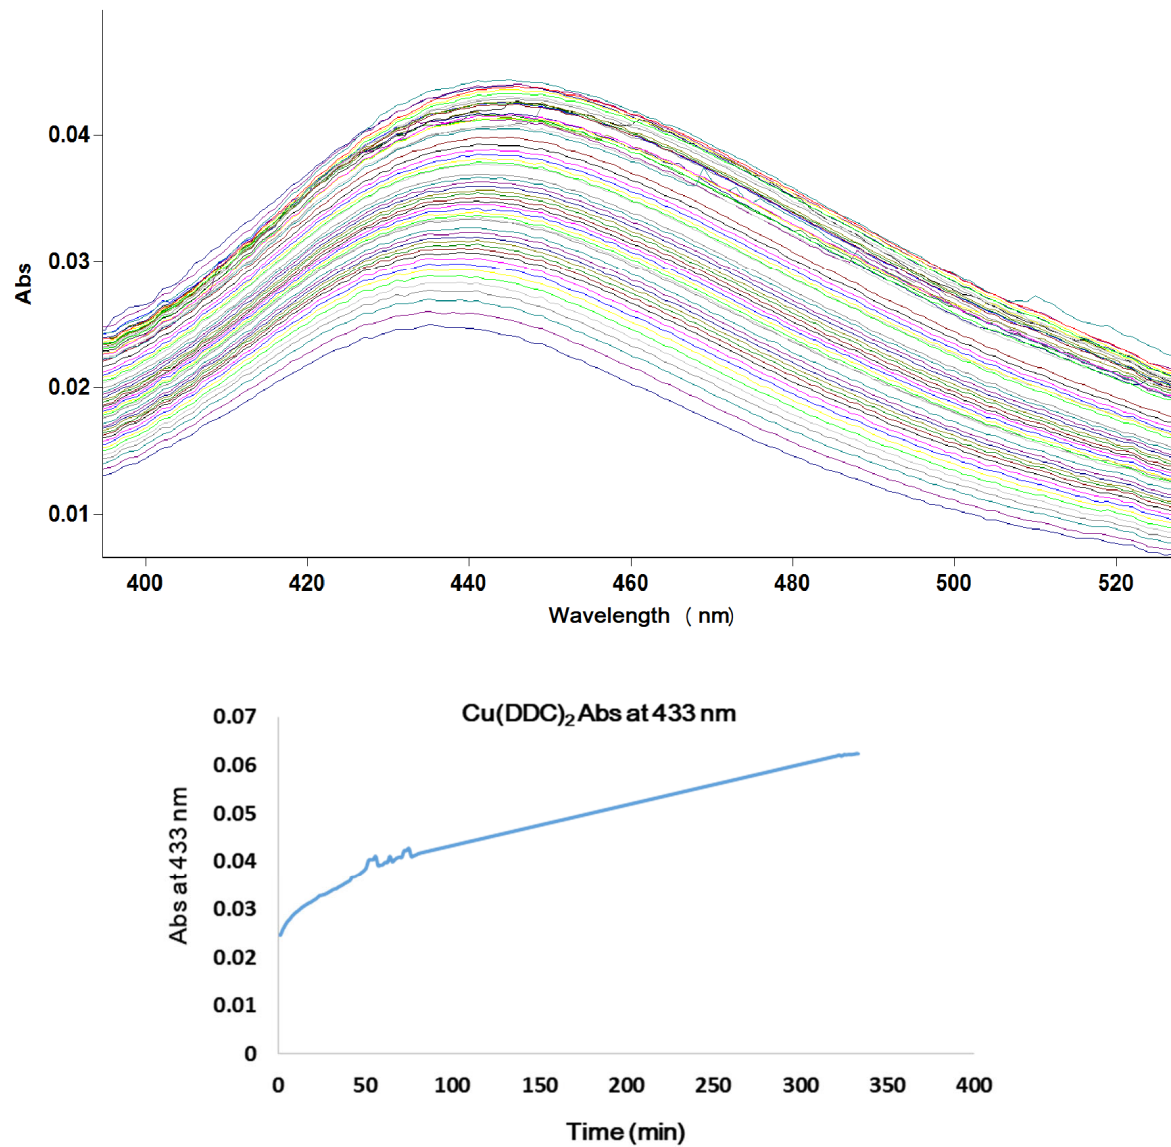

**Figure 2.** The appearance and growth of an absorption peak at 433 nm from the 1:1 mixture of disulfiram and copper(II) gluconate over time.

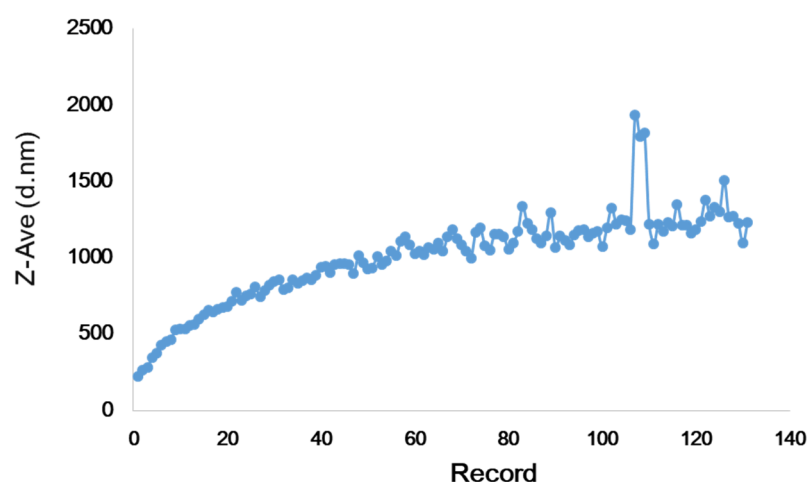

**Figure 3.** The growth of Cu(DDC)<sub>2</sub> particles from the 1:1 mixture of disulfiram and copper(II) gluconate over time.

Notably, a comparison of some approved drugs shows that the combination of disulfiram and Cu(Glu)<sub>2</sub> has a relatively low EC<sub>50</sub> value against SARS-CoV-2 at the cellular level. However, further experiments, especially carefully designed clinical trials, are necessary before any conclusion can be drawn on whether such combination can be used to treat COVID-19 or not.

Finally, we postulate that the boosting effect of Cu onto the anti-SARS-CoV-2 activity of disulfiram at the cellular level might be attributed to the *in situ* formation of Cu(DDC)<sub>2</sub>, which has been shown to possess an extraordinary ability to selectively oxidize zinc thiolate in the presence of thiols. Since zinc finger domains are present in several important SARS-CoV-2 enzymes crucial for the virus proliferation (*e.g.* RdRp),<sup>2,3</sup> Cu(DDC)<sub>2</sub> may impair the function of these enzymes to inhibit SARS-CoV-2 proliferation via selective oxidation of the zinc thiolate sites of zinc finger domains even in the presence of a high concentration of glutathione.<sup>4</sup>

69 **Table 2.** EC<sub>50</sub> values of various approved drugs against SARS-CoV-2 at the cellular level.

| Approved Drug                  | EC <sub>50</sub> (μM)<br>(Vero) | DOI                        |
|--------------------------------|---------------------------------|----------------------------|
| <b>DSF+Cu(Glu)<sub>2</sub></b> | <b>0.154</b>                    | <b>This work</b>           |
| Boceprevir                     | 15.57                           | 10.1038/s41467-020-18233-x |
| Disulfiram                     | ~10                             | 10.1038/s41586-020-2223-y  |
| Clofazimine                    | 0.31                            | 10.1038/s41586-020-2577-1  |
| Atazanavir                     | 2.0                             | 10.1021/acsptsci.0c00074   |
| Nelfinavir                     | 1.13                            |                            |
| Boceprevir                     | 1.9                             |                            |
| <b>Remdesivir</b>              | <b>0.72</b>                     | 10.1126/science.abg5827    |
| Desloratadine                  | 0.7                             |                            |
| Flupentixol                    | 0.76                            |                            |
| Ttrimipramine                  | 1.5                             |                            |
| Lapatinib                      | 1.6                             |                            |
| Benztropine                    | 1.8                             |                            |
| Azelastine                     | 2.4                             |                            |
| Masitinib                      | 3.2                             |                            |

70

## 71 **Methods**

### 72 **Anti-viral activity assays**

73 A clinical isolate of SARS-CoV-2(SARS-CoV-2 / SH01 / human / 2020 / CHN, GenBank MT121215).  
 74 The virus was purified by phagocytosis, reproduced in Vero-E6 cells, and stored in -80 °C for future use.  
 75 All tests involving virus infection are strictly conducted at a biosafety level-3. Gradient-diluted drugs  
 76 were mixed with SARS-CoV-2 (100TCID<sub>50</sub>) virus (the virus was diluted with serum-free DMEM  
 77 medium) with the same volume, and incubated at 37 °C for 1 hour. In the 96-well plates (vero-E6 cells  
 78 were 1×10<sup>4</sup>/ well), the supernatant was removed, 100 μL of the above drug/virus mixture was added, and  
 79 the cells were incubated at 37°C for 1 hour. At the end of incubation, 100 μL of DMEM+2% FBS was  
 80 added per well. After being placed in a cell incubator for further culture for 48 hours, the cell supernatant  
 81 was collected for subsequent detection. Viral RNA was extracted from the cell supernatant using TRIzol  
 82 LS reagent (Invitrogen) according to the manufacturer's instructions. One-step PrimeScript™ RT Reagent  
 83 Kit (Takara, Japan, Cat.#RR064A) Kit were used for quantitative real-time PCR. The reaction procedure  
 84 of RT-PCR was: Reverse transcription: 95 °C 10s, 42 °C 5min; PCR reaction: (95 °C 5s, 56 °C 30s,  
 85 72 °C 30s)\*40 cycles. The detection was carried out with a BIO-RAD quantitative fluorescence PCR  
 86 instrument. The primers were: SARS-COV-2-N-F: GGGGAAGTTCTCCTGCTAGAAT, SARS-CoV-2-  
 87 N-R: CAGACATTTTGCTCTC AAGCTG, SARS-CoV-2-N-probe: 5'-FAM-  
 88 TTGCTGCTGCTTGACAGATT-TAMRA-3'.

89



## References

1. Sargsyan, K.; Lin, C. C.; Chen, T.; Grauffel, C.; Chen, Y. P.; Yang, W. Z.; Yuan, H. S.; Lim, C., Multi-targeting of functional cysteines in multiple conserved SARS-CoV-2 domains by clinically safe Zn-ejectors. *Chem. Sci.* **2020**, *11* (36), 9904-9909.
2. Xu, L.; Tong, J.; Wu, Y.; Zhao, S.; Lin, B.-L., Targeted Oxidation Strategy (TOS) for potential inhibition of coronaviruses by Disulfiram — a 70-year old anti-alcoholism drug. *ChemRxiv* **2020**, <https://doi.org/10.26434/chemrxiv.11936292.v1>.
3. Xu, L.; Tong, J.; Wu, Y.; Zhao, S.; Lin, B. L., A computational evaluation of targeted oxidation strategy (TOS) for potential inhibition of SARS-CoV-2 by disulfiram and analogues. *Biophys. Chem.* **2021**, *276*, 106610.
4. Xu, L.; Xu, J.; Zhu, J.; Yao, Z.; Yu, N.; Deng, W.; Wang, Y.; Lin, B. L., Universal anticancer Cu(DTC)<sub>2</sub> discriminates between thiols and zinc(II) thiolates oxidatively. *Angew. Chem. Int. Ed.* **2019**, *58* (18), 6070-6073.

## Acknowledgements

We thank Dr. Qian Wang of Core Facility of Microbiology and Parasitology of Fudan University. We are very grateful to Dr. Di Qu, Xia Cai and Shan Su from Biosafety Level 3 Laboratory in Shanghai Medical College of Fudan University for their continuous support. This work was supported by the National Natural Science Foundation of China (No. U2032132).

## Competing interest

The authors declare no competing interests
